# Supplementary material for: 3D Printed Osteoblast–Alginate/Collagen Hydrogels Promote Survival, Proliferation and Mineralization at Low Doses of Strontium Calcium Polyphosphate
Source: MDPI journal article supplement (doi:10.3390/pharmaceutics15010011), 2022-12-20
Supplement: s1 [file s1]

## 3D Printed Osteoblast–Alginate/Collagen Hydrogels Promote Survival, Proliferation and Mineralization at Low Doses of Strontium Calcium Polyphosphate

Shebin Tharakan, Shams Khondkar, Sally Lee, Serin Ahn, Chris Mathew, Andrei Gresita, Michael Hadjiargyrou and Azhar Ilyas

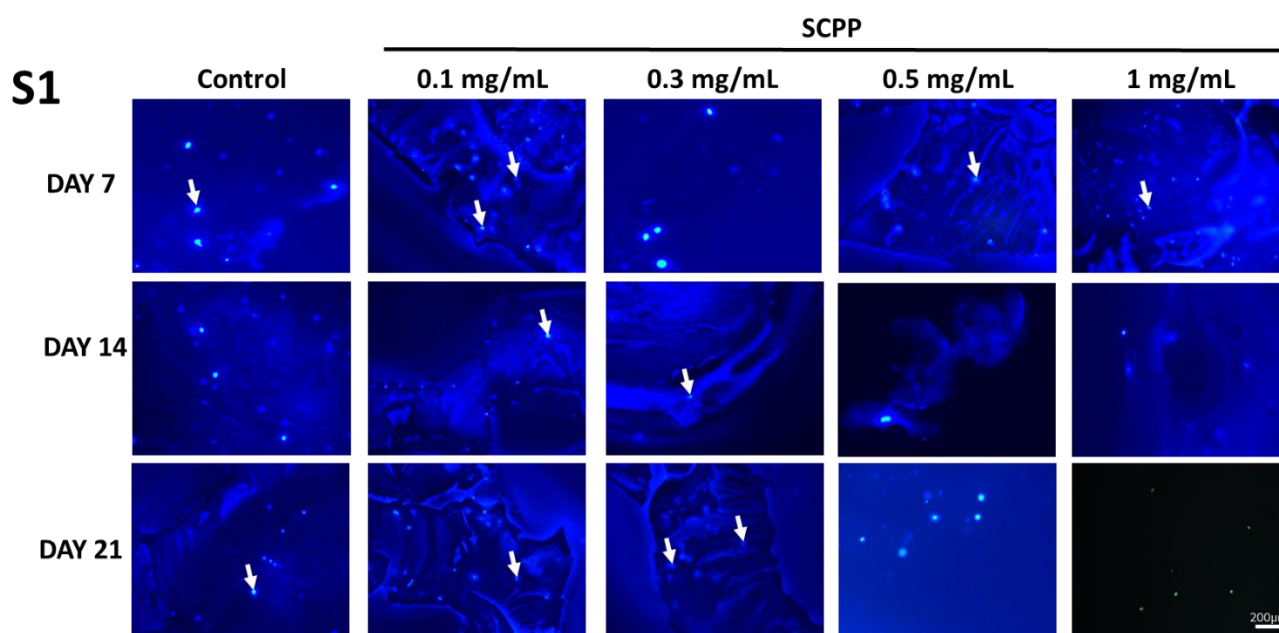

**Figure S1.** 20-micron cryosections stained with DAPI for 7, 14, and 21 days. Cells are able to live.
